# Supplementary material for: Catalytic ozonation of dimethyl phthalate by Ti–MCM-41 in water
Source: Royal Society of Chemistry journal article supplement (doi:10.1039/d4ra07901a), 2025-01-01
Supplement: d4ra07901a1.pdf [file d4ra07901a1.pdf]

1

2

*Supporting Information*

3

4

**Catalytic ozonation of dimethyl phthalate by Ti-MCM-41 in**

5

**water**

6 Jishuai Bing<sup>1,2,3,4</sup>, Yaoting Wang<sup>1,2,3</sup>, Yiming Zou<sup>1,2,3</sup>, Huimin Zhang<sup>1,2,3</sup>, Zhiling Chou<sup>1,2,3</sup>,

7

Weixiang Cheng<sup>1,2,3</sup>, Xin Xiao<sup>1,2,4,\*</sup>

8

1. Jiangsu Key Laboratory of Marine Biological Resources and Environment, Jiangsu Ocean

9

University, Lianyungang 222005, China.

10

2. Co-innovation Center of Jiangsu Marine Bio-Industry Technology, Jiangsu Ocean

11

University, Lianyungang 222005, China

12

3. Lianyungang Environmental Science and Technology Service Center, Lianyungang

13

222005, China.

14

4. Jiangsu Institute of Marine Resources Development, Lianyungang 222005, China.

15

\*Corresponding author. E-mail: [xiaoxin@njust.edu.cn](mailto:xiaoxin@njust.edu.cn)

16

17

18

The Supporting Information contains 2 pages and 1 Figure.

19

20

21

22

23

24

25

26  
27  
28  
29  
30

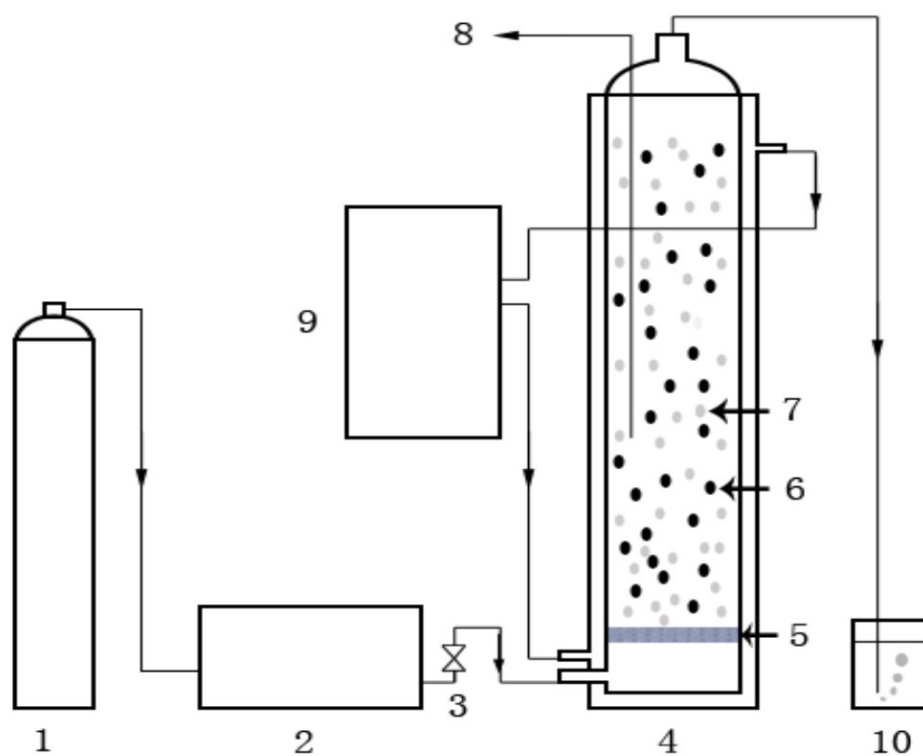

31  
32  
33  
34  
35  
36

**Figuer S1.** Schematic diagram of catalytic ozonation experimental apparatus. (1) oxygen cylinder, (2) ozone generator, (3) gas flow rate meter, (4) ozonation reactor, (5) porous glass plate, (6) catalyst, (7) bubble, (8) sampling point, (9) thermostatic bath, (10)  $\text{Na}_2\text{S}_2\text{O}_3$  trap
